# Supplementary material
Source: PubMed Central journal article supplement (PMC7751012)
Supplement: jz0c03123_si_001.pdf [file jz0c03123_si_001.pdf]

**Supporting information for:**

**Static Disorder in Excitation Energies of the**

**Fenna-Matthews-Olson Protein: Structure-Based**

**Theory Meets Experiment**

Marten L. Chaillet,<sup>†</sup> Florian Lengauer,<sup>‡</sup> Julian Adolphs,<sup>¶</sup> Frank Müh,<sup>‡</sup> Alexander  
S. Fokas,<sup>§</sup> Daniel J. Cole,<sup>||</sup> Alex W. Chin,<sup>⊥</sup> and Thomas Renger<sup>\*,‡</sup>

<sup>†</sup>*Bijvoet Centre for Biomolecular Research, University of Utrecht, Heidelberglaan 8, 3584  
CS Utrecht, The Netherlands*

<sup>‡</sup>*Institute of Theoretical Physics, Johannes Kepler University Linz, Altenberger Str. 69,  
4040 Linz, Austria*

<sup>¶</sup>*Leibniz Institute for Agricultural Engineering and Bioeconomy, Max-Eyth-Allee 100,  
14469 Potsdam, Germany*

<sup>§</sup>*TCM Group, Cavendish Laboratory, 19 J J Thomson Avenue, Cambridge CB3 0HE,  
United Kingdom*

<sup>||</sup>*School of Natural and Environmental Sciences, Newcastle University, Newcastle upon  
Tyne NE1 7RU, United Kingdom*

<sup>⊥</sup>*Centre National de la Recherche Scientifique, Institute des Nanosciences de Paris,  
Sorbonne Universite, Paris, France*

E-mail: thomas.renger@jku.at

# Exciton-vibrational coupling

The fast fluctuation of site energies is described by the exciton-vibrational Hamiltonian

$$H_{\text{ex-vib}} = \sum_m \hbar\omega_\xi g_\xi(m) Q_\xi |m\rangle \langle m| \quad (\text{S1})$$

containing the (dimensionless) coupling constants  $g_\xi(m)$  and vibrational coordinate  $Q_\xi$  of normal mode  $\xi$  of the PPC, the motion of which is described by the vibrational Hamiltonian

$$H_{\text{vib}} = \sum_\xi \frac{\hbar\omega_\xi}{4} (Q_\xi^2 + P_\xi^2) \quad (\text{S2})$$

containing the vibrational frequencies  $\omega_\xi$  and the dimensionless coordinate and conjugated momentum  $Q_\xi$  and  $P_\xi$ , respectively. In principle, also the excitonic couplings could fluctuate, but a normal mode analysis of the spectral density<sup>S1</sup> has revealed that this variation is about two orders of magnitude smaller than that of the site energies. Note that, in general, the exciton-vibrational coupling constants  $g_\xi(m)$  and the vibrational frequencies  $\omega_\xi$  also depend on the conformation  $c$  of the PPC. This dependence still needs to be studied and is neglected here for simplicity.

Transformation of the exciton-vibrational Hamiltonian in Eq. S1 to the basis of exciton states  $|M\rangle = \sum_m c_m^{(M)} |m\rangle$ , defined as the eigenstates of the Hamiltonian  $H_{\text{ex}}$  (Eq. 1 of the main text) at the equilibrium position of nuclei in the electronic ground state of the complex, gives

$$H_{\text{ex-vib}} = \sum_{M,N} \hbar\omega_\xi g_\xi(M,N) Q_\xi |M\rangle \langle N| \quad (\text{S3})$$

with the exciton-vibrational coupling constant in the exciton basis reading

$$g_\xi(K,M) = \sum_m g_\xi(m) c_m^{(K)} c_m^{(M)}. \quad (\text{S4})$$

Due to the partial localization of exciton states, caused by the different site energies of

the pigments, the off-diagonal elements  $g_\xi(K, M)$  ( $K \neq M$ ) are smaller than the diagonal elements  $g_\xi(M, M)$ <sup>S1</sup>. This inequality is used in the theory of optical spectra below, where the diagonal elements are taken into account exactly and the off-diagonal elements are treated in Markov and secular approximation.

## Theory of optical spectra

The optical lineshape function  $D_M(\omega)$  of the excitation of the  $M$ th exciton state reads<sup>S2</sup>

$$D_M(\omega) = \frac{1}{2\pi} \int_{-\infty}^{\infty} dt e^{i(\omega - \tilde{\omega}_{M0})t} e^{\gamma_{MM}\{G(t) - G(0)\}} e^{-|t|/\tau_M} \quad (\text{S5})$$

where

$$G(t) = \int_0^\infty d\omega J(\omega) \{(1 + n(\omega))e^{-i\omega t} + n(\omega)e^{i\omega t}\} \quad (\text{S6})$$

contains the spectral density of the site energy fluctuations

$$J(\omega) = \sum_{\xi} g_{\xi}^2 \delta(\omega - \omega_{\xi}) \quad (\text{S7})$$

that is assumed to be the same for all pigments for simplicity, and the Bose-Einstein distribution function of vibrational quanta

$$n(\omega) = \frac{1}{e^{\hbar\omega/k_{\text{B}}T} - 1}. \quad (\text{S8})$$

The function  $G(t)$  contains the diagonal parts of the exciton-vibrational coupling, treated exactly, and gives rise to vibrational sidebands in the lineshape. The frequency

$$\tilde{\omega}_{M0} = \omega_{M0} - \gamma_{MM}E_{\lambda}/\hbar + \sum_{K}^{K \neq M} \gamma_{MK} \tilde{C}^{\text{Im}}(\omega_{MK}) \quad (\text{S9})$$

contains the eigenfrequency  $\omega_{M0}$  of  $H_{\text{exc}}$  that is renormalized by the diagonal part and the

off-diagonal part of the exciton-vibrational coupling appearing in the second and third terms on the r.h.s., respectively.  $E_\lambda = \sum_\xi \hbar\omega_\xi g_\xi^2$  is the reorganization energy of the local electronic transitions and

$$\gamma_{MK} = \sum_m |c_m^{(M)}|^2 |c_m^{(K)}|^2 \quad (\text{S10})$$

contains the coefficients of the exciton wave functions.

For the spectral density  $J(\omega)$ , we take the functional form extracted from fluorescence line narrowing spectra of the B777-complex<sup>S2</sup> and rescale it such that the Huang-Rhys factor  $S = \int d\omega J(\omega)$  equals 0.5, as determined from the temperature dependence of linear absorption spectra of the FMO protein.<sup>S3</sup>

The off-diagonal parts of the exciton-vibrational coupling, treated in Markov and secular approximation, lead to the exciton relaxation-induced lifetime broadening described by the dephasing constant

$$\tau_M^{-1} = \frac{1}{2} \sum_K k_{M \rightarrow K} \quad (\text{S11})$$

that contains the Redfield relaxation rate constant

$$k_{M \rightarrow K} = 2\gamma_{MK} \tilde{C}^{\text{Re}}(\omega_{MK}) \quad (\text{S12})$$

with

$$\tilde{C}^{\text{Re}}(\omega) = \pi\omega^2 \{ (1 + n(\omega))J(\omega) + n(-\omega)J(-\omega) \}. \quad (\text{S13})$$

The  $\tilde{C}^{\text{Im}}(\omega)$  in Eq. S9 follows from the above quantity by the principal part integral<sup>S4</sup>

$$\tilde{C}^{\text{Im}}(\omega) = \frac{1}{\pi} \wp \int_{-\infty}^{\infty} d\omega' \frac{\tilde{C}^{\text{Re}}(\omega')}{\omega_{MK} - \omega'} \quad (\text{S14})$$

The linear dichroism spectrum  $LD(\omega)$  is obtained by replacing the  $|d_M|^2$  in Eq. 2 of the main text by  $|d_M|^2(1 - 3\cos^2\theta_M)$ , with the angle  $\theta_M$  between the exciton transition dipole moment  $\mathbf{d}_M$  and the symmetry axis of the FMO trimer. In the calculation of the circular

dichroism spectrum  $CD(\omega)$ , the  $|d_M|^2$  in Eq. 2 of the main text has to be replaced by  $\sum_{m,n} c_m^{(M)} c_n^{(M)} \mathbf{R}_{mn} \cdot (\mathbf{d}_m \times \mathbf{d}_n)$  with the distance vector  $\mathbf{R}_{mn} = \mathbf{R}_m - \mathbf{R}_n$  and the local transition dipole moments  $\mathbf{d}_m$  and  $\mathbf{d}_n$  of pigments  $m$  and  $n$ , respectively.

Finally, we note that the excitonic couplings between pigments in different FMO monomers are so small that they have no influence on the optical spectra. Dynamic localization effects due to the exciton-vibrational coupling restrict the delocalization of exciton states to the monomeric subunits of the FMO protein. Here, we take into account this effect implicitly by restricting exciton delocalization to the FMO monomers.

## Static disorder in excitonic couplings

The excitonic couplings for the different conformations of the FMO protein, obtained with FRODA, were calculated with the transition charge from electrostatic potential (TrEsp) method.<sup>S5</sup> Transition charges of non-hydrogen atoms, obtained in earlier work<sup>S5</sup> from a fit of the ESP of the ab initio transition density of the  $S_0 \rightarrow S_1$  transition of geometry-optimized BChl *a*, where rescaled to take into account a vacuum dipole strength of 37.1 D<sup>2</sup> determined by Knox and Spring<sup>S6</sup> in an empty cavity analysis of the experimental dipoles strength in different solvents and an average screening/local field correction factor of 0.8 for the Coulomb-coupling between transition densities as determined from Poisson-TrEsp calculations.<sup>S3</sup> The excitonic coupling between pigments  $m$  and  $n$  follows from these rescaled transition charges as

$$V_{mn}(c) = \sum_{I,J} \frac{q_I(1,0)q_J(1,0)}{|\mathbf{R}_I^{(m)}(c) - \mathbf{R}_J^{(n)}(c)|} \quad (\text{S15})$$

where  $\mathbf{R}_I^{(m)}(c)$  and  $\mathbf{R}_J^{(n)}(c)$  are the positions of heavy atoms (and corresponding transition charges) of pigments  $m$  and  $n$  for the conformation  $c$  of the FMO protein. Numerical values of the rescaled transition charges are given in Table S3. The distribution functions of the couplings obtained from the different FRODA conformations are Gaussians that are characterized by their FWHM and center positions in Table S4. The optical spectra obtained by

including these coupling fluctuations are compared in Fig. S9 with calculations using constant excitonic couplings. The latter couplings have been obtained from the crystal structure using a point dipole approximation (PDA) and assuming an effective dipole strength of  $30 D^2$  (as in the TrEsp calculations).<sup>S3</sup> The couplings in PDA are close to the mean values obtained from the FRODA-TrEsp calculations (Table S4) and the inclusion of static disorder in excitonic couplings has practically no influence on the optical spectra (Fig. S9).

*Top View*

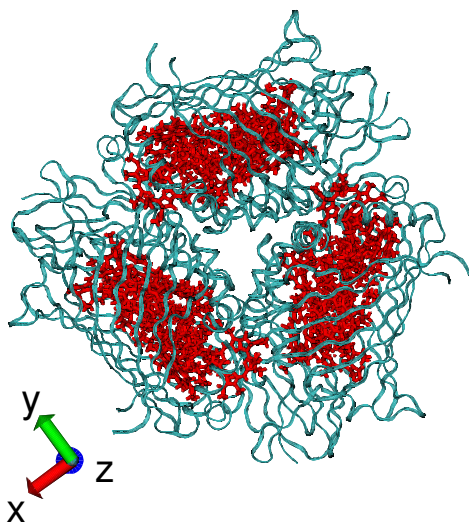

*Side View*

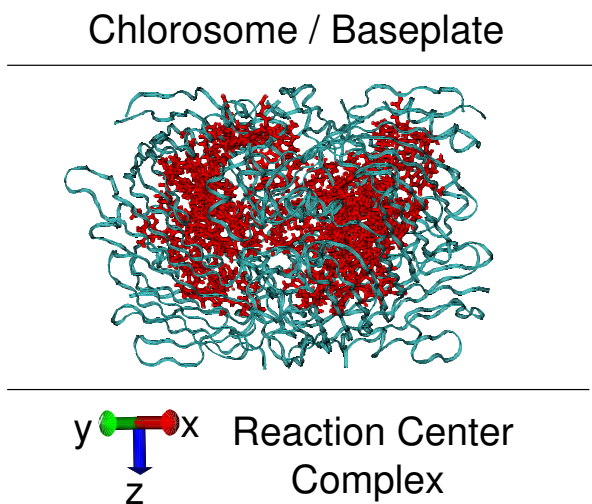

Figure S1: Complete structure of the trimeric FMO protein of *P. aestuarii*<sup>S7</sup> in top view from the direction of the chlorosome towards the reaction center complex (left part) and in a side view (right part). Each monomeric subunit binds 8 BChl *a* pigments, which are shown in red. The protein is shown in ribbon style. An enlarged view of a monomeric subunit is provided in Fig. 1 of the main text.

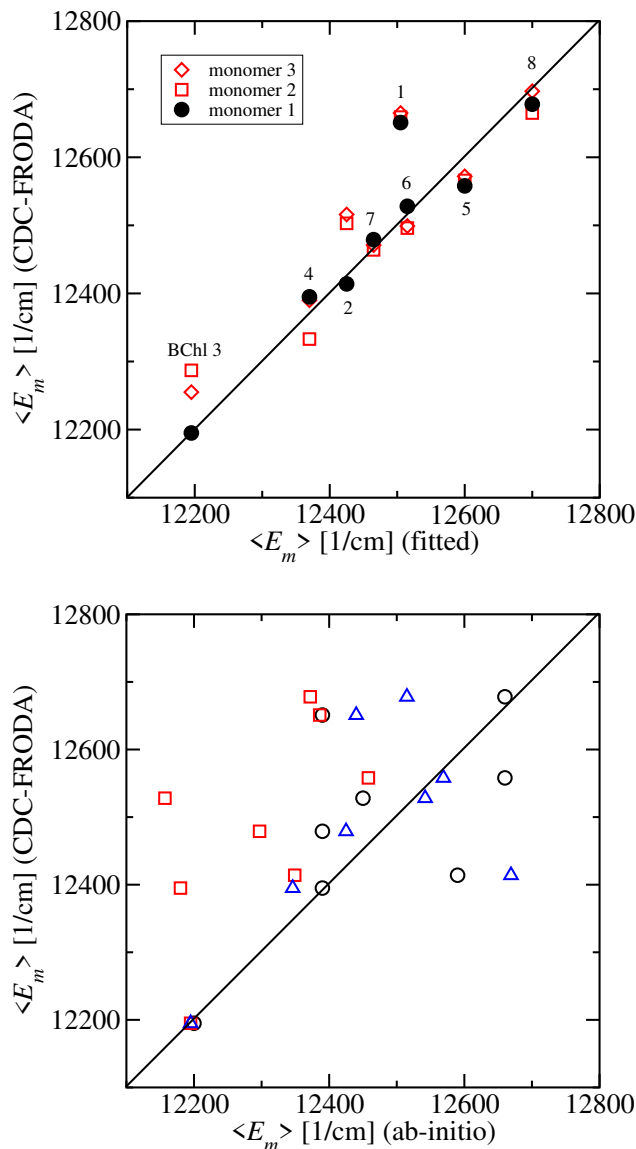

Figure S2: **Upper part:** Correlation between the mean site energies  $\langle E_m \rangle$  (fitted) obtained earlier<sup>S8</sup> by CDC calculations and fits of experimental spectra and the mean site energies  $\langle E_m \rangle$  (CDC – FRODA) obtained here from the FRODA/CDC calculations for the three monomeric subunits of the FMO protein. **Lower part:** Correlation between the  $\langle E_m \rangle$  (CDC – FRODA) site energies of monomer 1 and ab-initio calculations from the literature: QM/MM with Shepard interpolation correction<sup>S9</sup>, applying a constant shift of  $-1720 \text{ cm}^{-1}$  to all ab-initio site energies (black circles), QM/MMPol with short-range corrections from Table S4 of the supporting information of ref.<sup>S10</sup>, applying a constant shift of  $-1679 \text{ cm}^{-1}$  (red squares), and QM/MM-QM/EFP (Fig. 4 of ref.<sup>S11</sup>, applying a constant shift of  $-2390 \text{ cm}^{-1}$  (blue triangles). The latter calculations were performed on *Chlorobaculum tepidum* formerly known as *Chlorobium tepidum*, whereas all other calculations refer to *Prostecochloris aestuarii*. Note, that both species are expected to have similar site energies.<sup>S3</sup> The diagonal lines in the upper and lower graphs illustrate a perfect correlation.

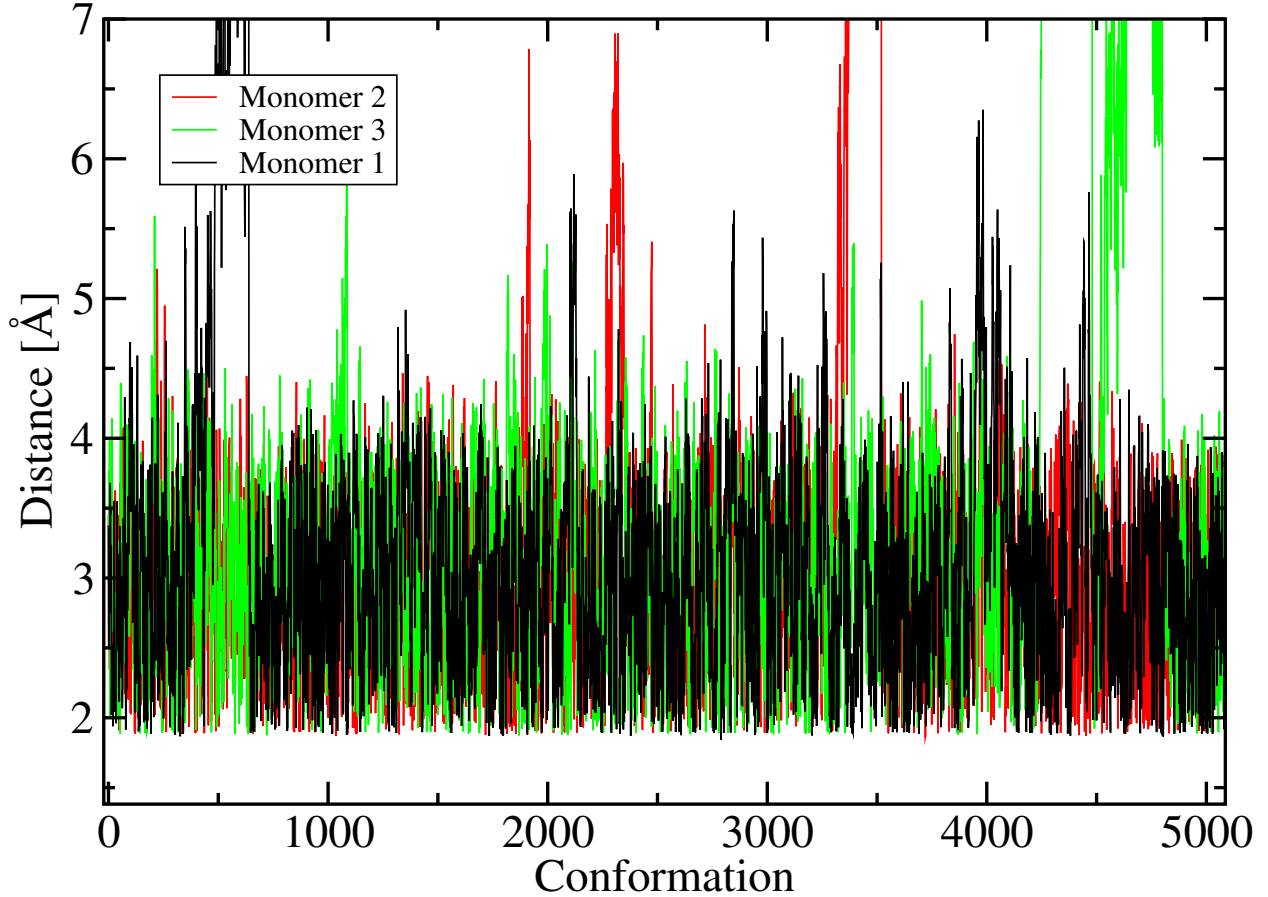

Figure S3: Distance between the oxygen atom of a water molecule in the neighborhood of BChl 1 and the oxygen atom of the 3-acetyl group of BChl 1 in the three monomeric subunits of the FMO protein in the course of the FRODA MC simulations. The large amplitude of the distance variations indicates that the hydrogen bond between the two oxygen atoms is not stable.

**Table S1: Centers  $\langle \Delta E_m \rangle$  and FWHM of the Gaussian distribution functions of site energy shifts of the BChls ( $m = 1, \dots, 8$ ) in monomer 1 (Fig. 3 of the main text) and in monomers 2 and 3. All quantities in units of  $\text{cm}^{-1}$ .**

| $m$ | Monomer 1                    |       | Monomer 2                    |       | Monomer 3                    |       |
|-----|------------------------------|-------|------------------------------|-------|------------------------------|-------|
|     | $\langle \Delta E_m \rangle$ | FWHM  | $\langle \Delta E_m \rangle$ | FWHM  | $\langle \Delta E_m \rangle$ | FWHM  |
| 1   | 90.7                         | 86.9  | 98.6                         | 84.5  | 105.1                        | 88.0  |
| 2   | -145.9                       | 107.0 | -56.8                        | 133.9 | -44.1                        | 125.3 |
| 3   | -364.7                       | 128.6 | -273.2                       | 167.1 | -304.6                       | 159.9 |
| 4   | -165.4                       | 93.0  | -227.0                       | 96.7  | -170.1                       | 106.1 |
| 5   | -2.4                         | 85.9  | 5.9                          | 86.2  | 11.8                         | 86.3  |
| 6   | -32.1                        | 151.4 | -63.5                        | 129.2 | -61.1                        | 119.6 |
| 7   | -81.5                        | 118.6 | -95.7                        | 108.8 | -88.8                        | 114.9 |
| 8   | 117.5                        | 217.6 | 105.2                        | 220.8 | 137.4                        | 218.1 |



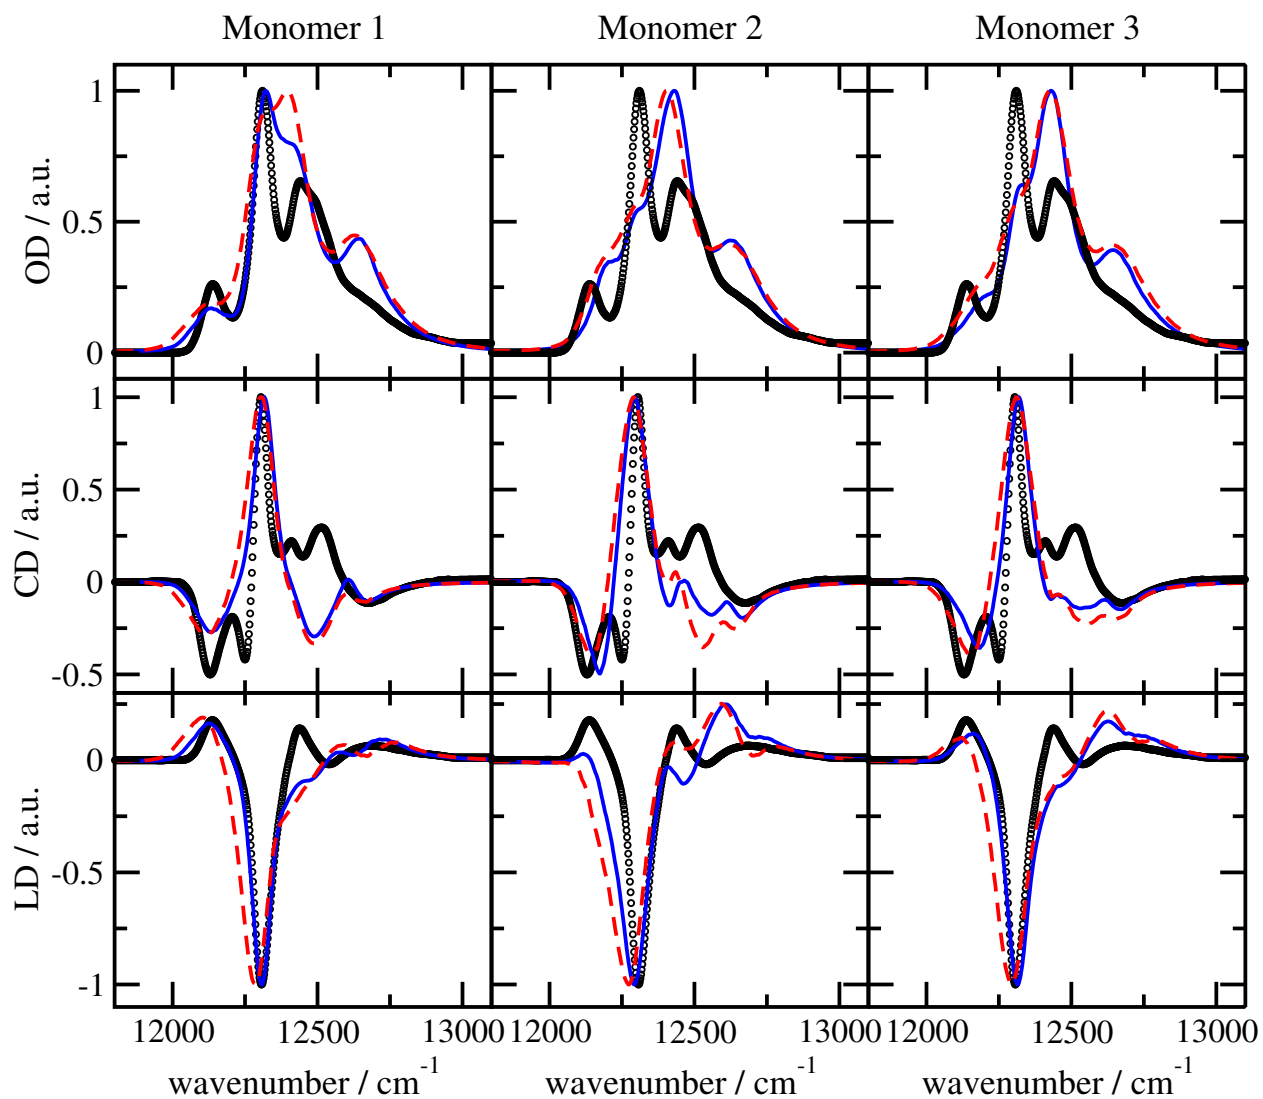

Figure S4: Low-temperature (4 K) optical spectra of the three monomeric subunits of the FMO protein, calculated by neglecting (blue solid lines) or taking into account (red-dashed lines) the interaction of pigments with water molecules, are compared with experimental data<sup>S12</sup> (black circles).

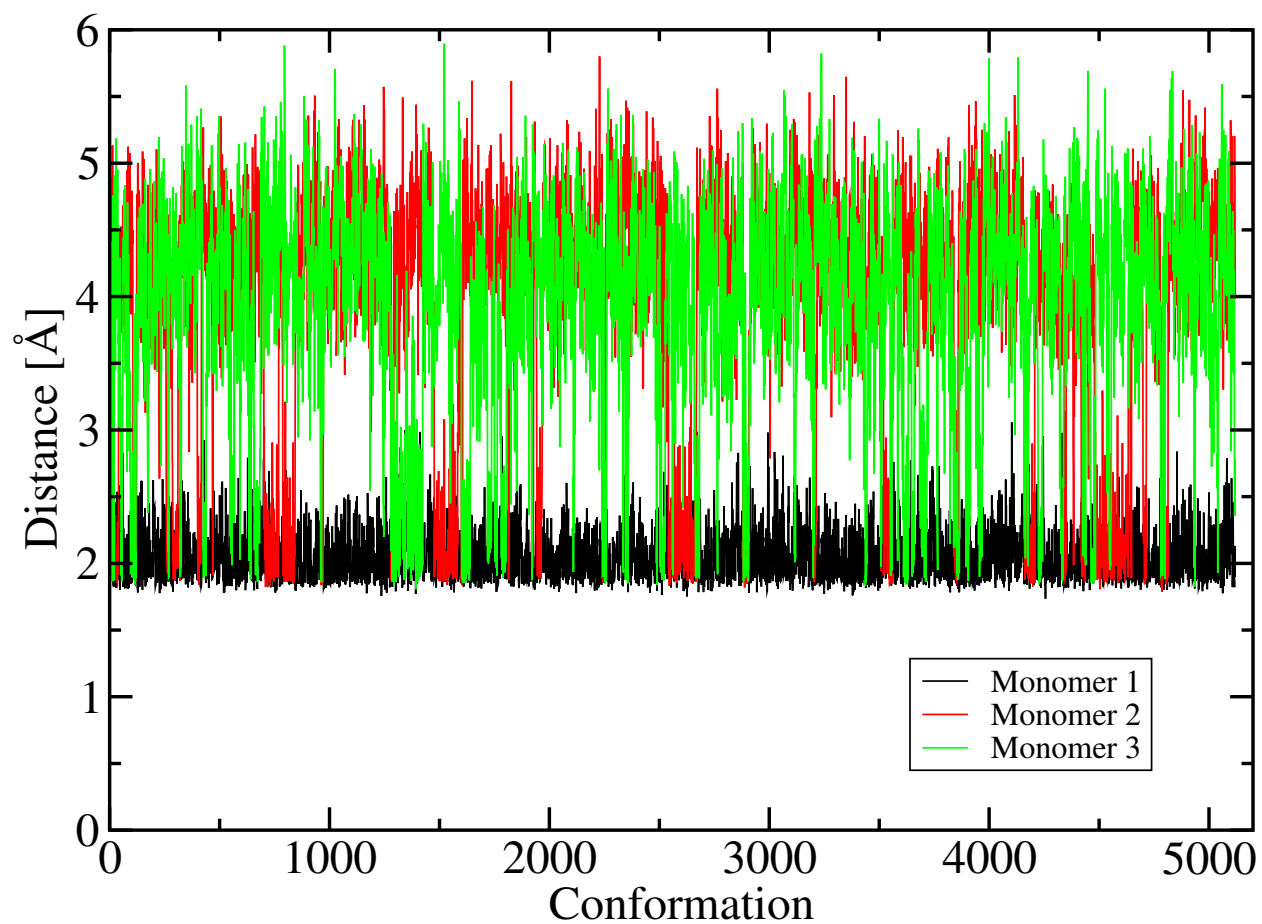

Figure S5: Distance between the hydroxy oxygen atom of Ser 72 and the oxygen atom of the 3-acetyl group of BChl 2 in the three monomeric subunits of the FMO protein in the course of the FRODA MC simulations. The data indicate that in monomer 1, the hydrogen bond is permanently formed, whereas it is broken for most of the conformations in monomers 2 and 3.

## BChl 2 and Ser 72

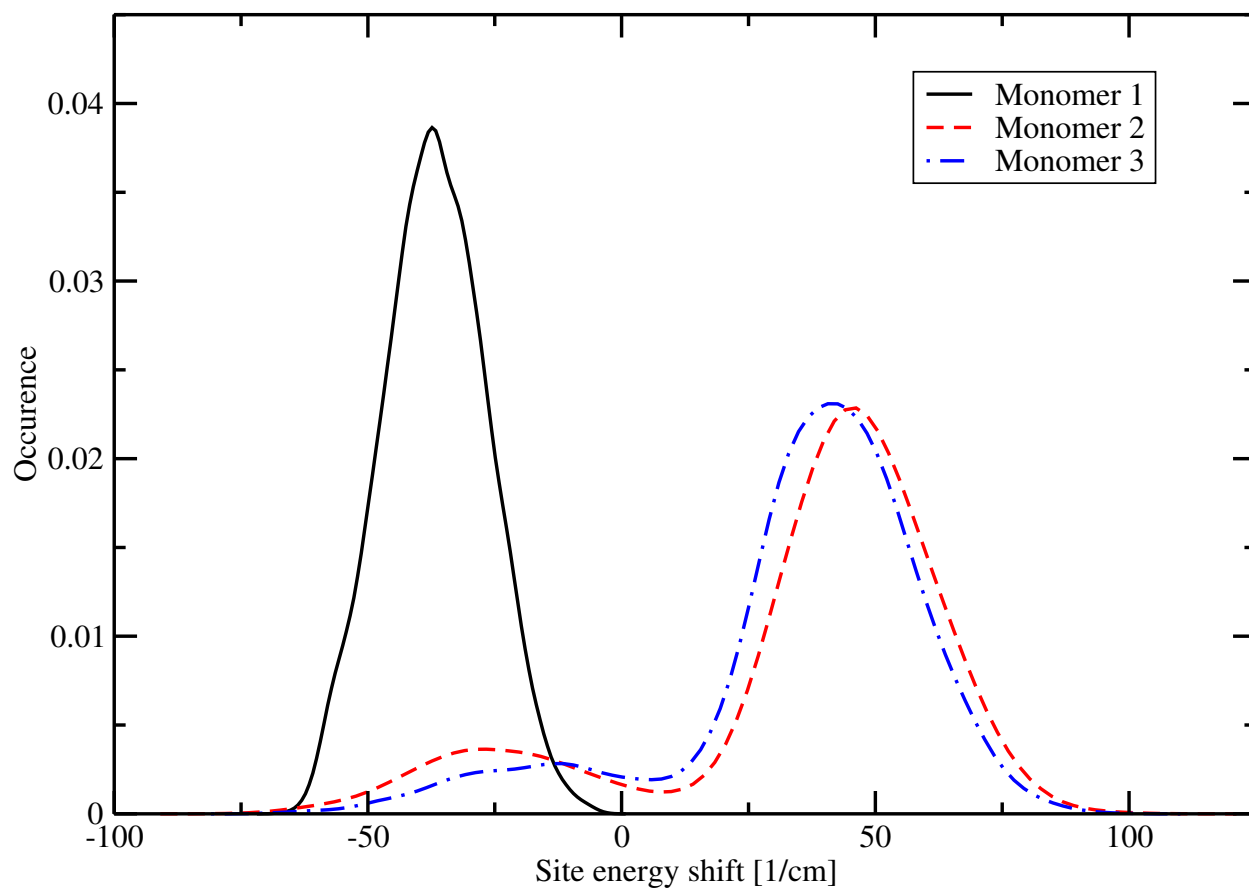

Figure S6: Distribution of site energy shift of BChl 2 caused by Ser 72 in the three monomeric subunits of the FMO protein, obtained from histograms of  $\Delta E_2^{(\text{Ser}72)}$  (Eq. 4 of the main text).

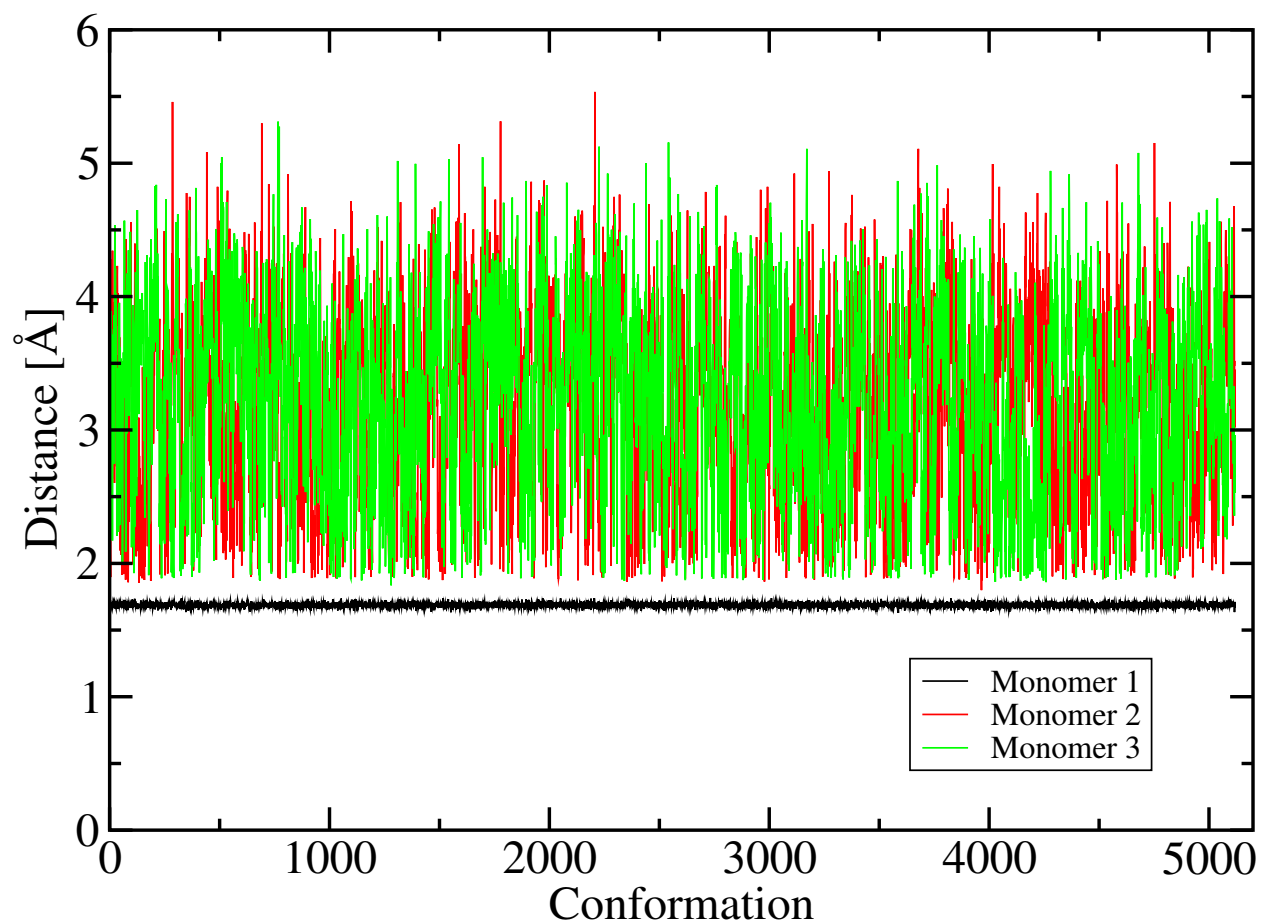

Figure S7: Distance between the hydroxy oxygen atom of Tyr 15 and the oxygen atom of the 3-acetyl group of BChl 3 in the three monomeric subunits of the FMO protein in the course of the FRODA MC simulations. The data indicate that there is a strong, stable hydrogen bond in monomer 1, whereas the hydrogen bond is broken in most of the conformations in monomers 2 and 3.

## BChl 3 and Tyr 15

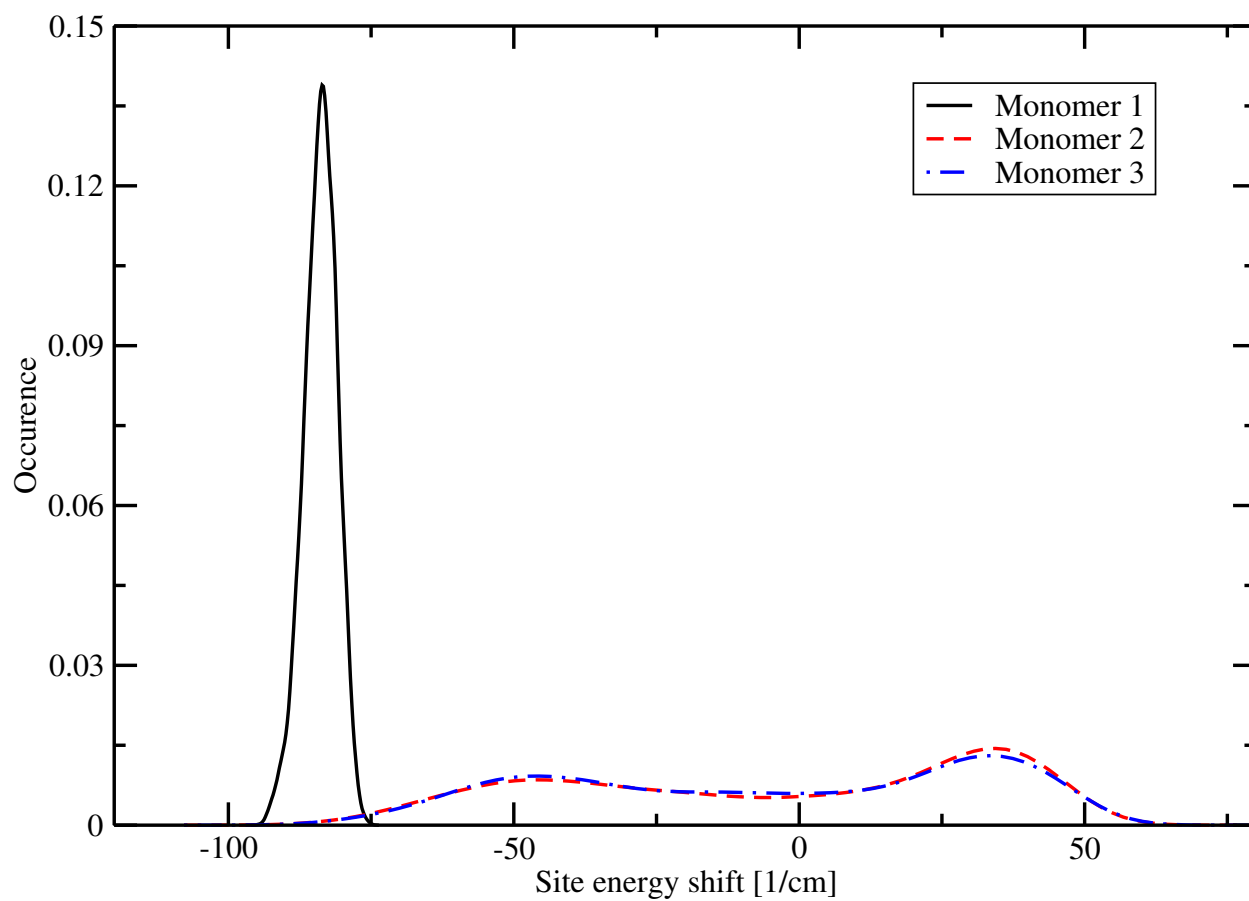

Figure S8: Distribution of site energy shift of BChl 3 caused by Tyr-15 in the three monomeric subunits of the FMO protein, obtained from histograms of  $\Delta E_3^{(\text{Tyr}15)}$  (Eq. 4 of the main text).

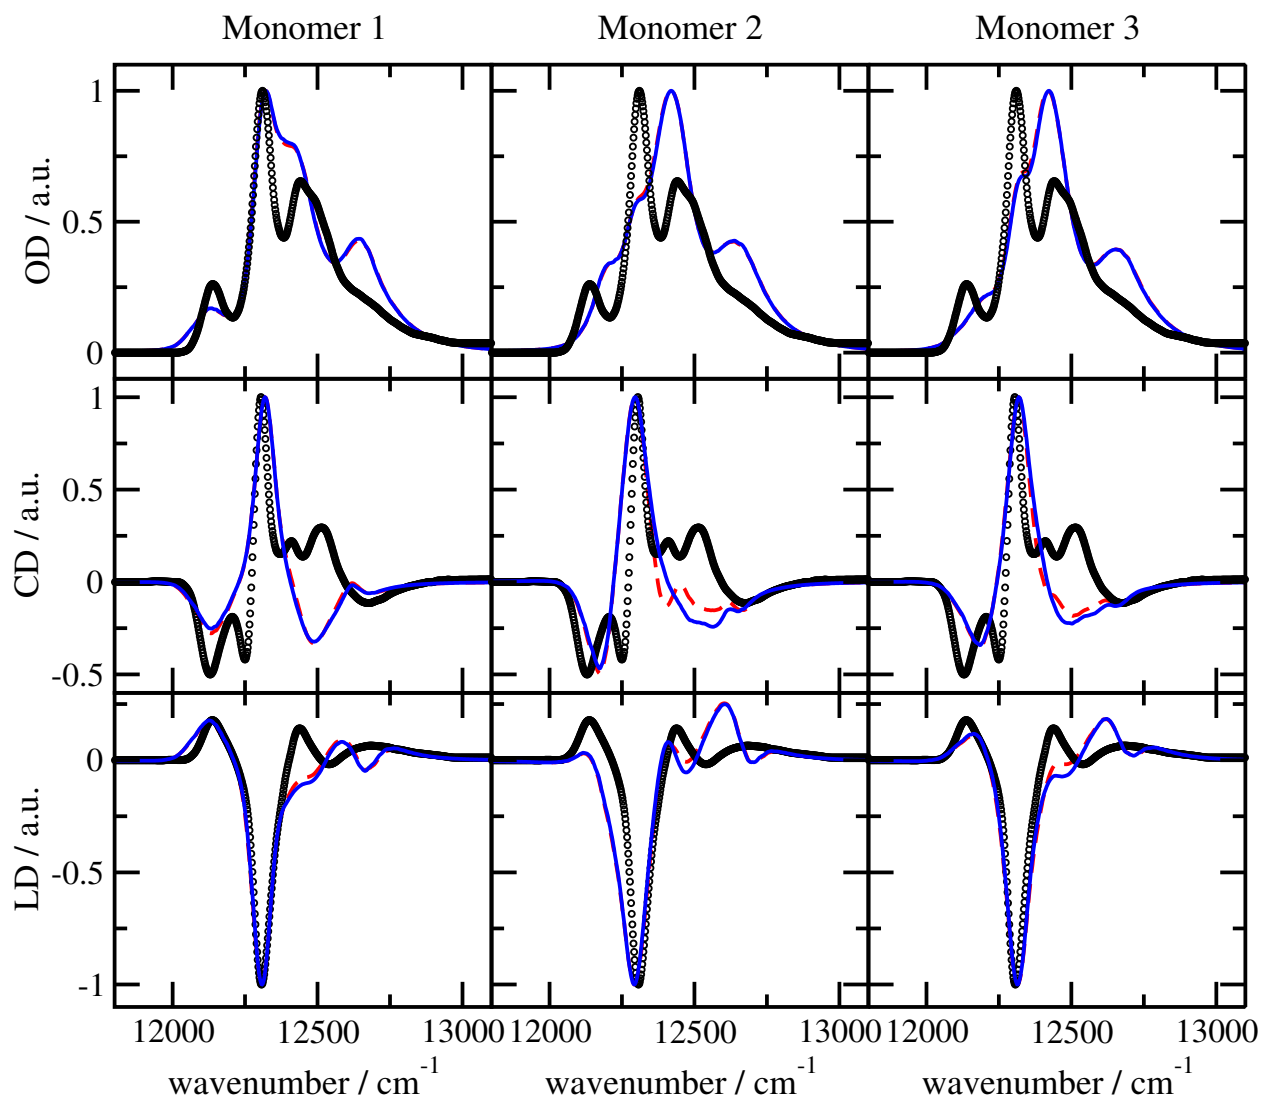

Figure S9: Low temperature (4 K) optical spectra of the three monomeric subunits of the FMO protein, calculated by neglecting (blue solid lines) or taking into account (red-dashed lines) static disorder in excitonic couplings (quantified in Table S4), are compared with experimental data<sup>S12</sup> (black circles).

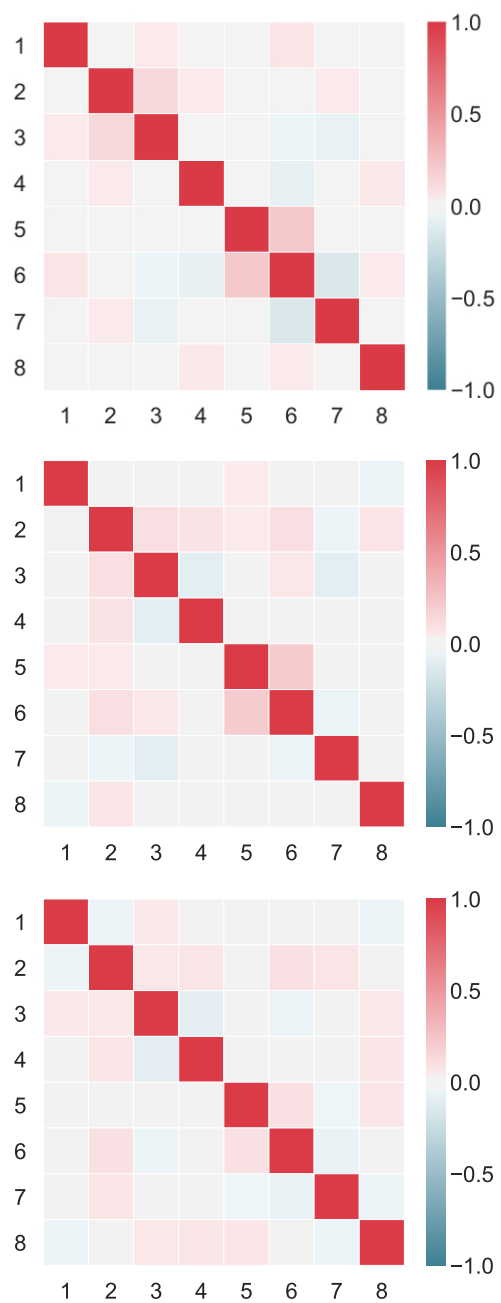

Figure S10: Pearson correlation coefficient for the static disorder in site energies of the 8 BChl pigments of monomer 1 (upper part), monomer 2 (middle part), and monomer 3 (lower part) of the FMO protein.

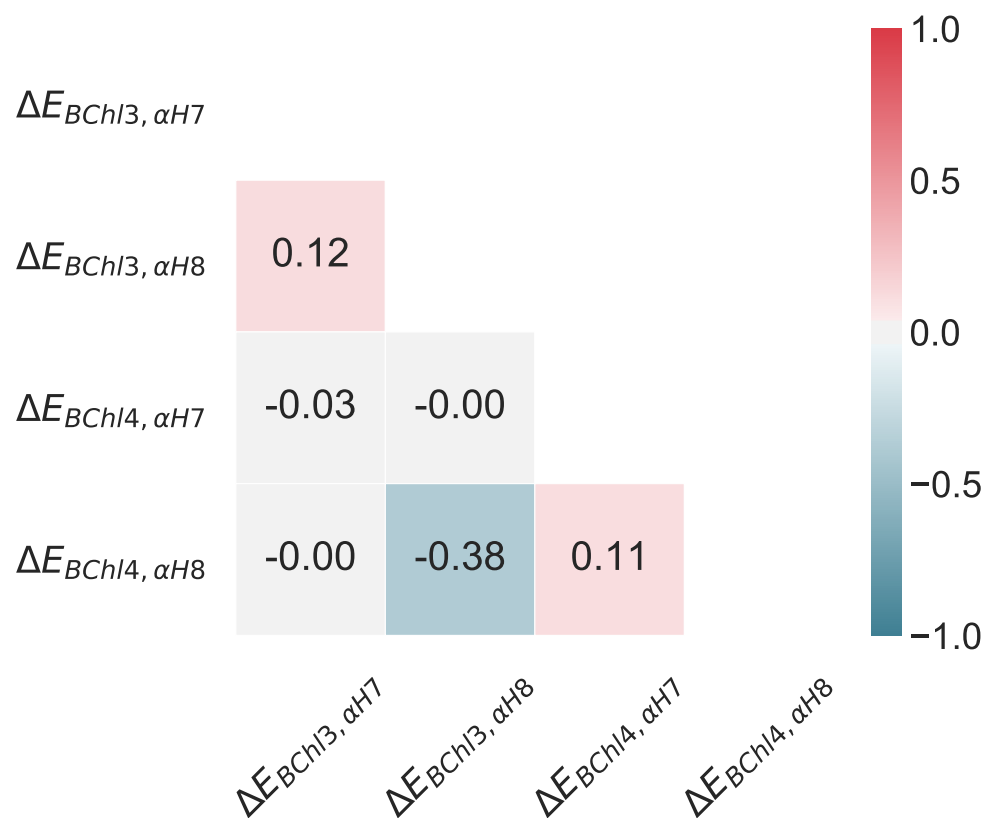

Figure S11: Pearson correlation coefficient for the static disorder in site energies of BChls 3 and 4 caused by the backbone of  $\alpha$ -helices H7 and H8 (for the location of these helices in the FMO protein, see Fig. 1 of ref.<sup>S13</sup>).



Table S2: Atomic partial charges  $q_I(0,0)$  and  $q_I(1,1)$  of the charge density of the electronic ground- and excited state, respectively, of geometry-optimized planar BChl *a*. The partial charges were obtained in ref.<sup>S5</sup> from a fit of the electrostatic potential (ESP) of the respective charge density obtained with (time-dependent) density functional theory, using the B3LYP exchange correlation functional and a 6-31G\* basis set. Please note that the charges reported in the SI of ref.<sup>S5</sup> were obtained by using only the non-hydrogen atom positions in the fit of the ESP. Here, we report the charges obtained including the hydrogen atoms.

| <i>I</i> | Atom | $q_I(0,0)$ | $q_I(1,1)$ | <i>I</i> | Atom | $q_I(0,0)$ | $q_I(1,1)$ | <i>I</i> | Atom | $q_I(0,0)$ | $q_I(1,1)$ |
|----------|------|------------|------------|----------|------|------------|------------|----------|------|------------|------------|
| 1        | MG   | 1.262      | 1.244      | 48       | C3C  | -0.008     | 0.000      | 95       | C6   | -0.180     | -0.180     |
| 2        | CHA  | 0.367      | 0.319      | 49       | H3C  | 0.104      | 0.105      | 96       | H61  | 0.090      | 0.090      |
| 3        | CHB  | -0.457     | -0.496     | 50       | C4C  | 0.429      | 0.501      | 97       | H62  | 0.090      | 0.090      |
| 4        | HB   | 0.159      | 0.161      | 51       | CMC  | -0.181     | -0.168     | 98       | C7   | -0.180     | -0.180     |
| 5        | CHC  | -0.720     | -0.782     | 52       | 1HMC | 0.069      | 0.067      | 99       | H71  | 0.090      | 0.090      |
| 6        | HC   | 0.311      | 0.311      | 53       | 2HMC | 0.069      | 0.067      | 100      | H72  | 0.090      | 0.090      |
| 7        | CHD  | -0.680     | -0.715     | 54       | 3HMC | 0.069      | 0.067      | 101      | C8   | -0.090     | -0.090     |
| 8        | HD   | 0.223      | 0.222      | 55       | CAC  | -0.315     | -0.315     | 102      | H81  | 0.090      | 0.090      |
| 9        | NA   | -0.545     | -0.587     | 56       | 1HAC | 0.127      | 0.128      | 103      | C9   | -0.270     | -0.270     |
| 10       | C1A  | 0.065      | 0.105      | 57       | 2HAC | 0.127      | 0.128      | 104      | H91  | 0.090      | 0.090      |
| 11       | C2A  | -0.242     | -0.242     | 58       | CBC  | -0.164     | -0.165     | 105      | H92  | 0.090      | 0.090      |
| 12       | H2A  | 0.238      | 0.242      | 59       | 1HBC | 0.065      | 0.065      | 106      | H93  | 0.090      | 0.090      |
| 13       | C3A  | -0.218     | -0.218     | 60       | 2HBC | 0.065      | 0.065      | 107      | C10  | -0.180     | -0.180     |
| 14       | H3A  | 0.202      | 0.204      | 61       | 3HBC | 0.065      | 0.065      | 108      | 1H10 | 0.090      | 0.090      |
| 15       | C4A  | 0.479      | 0.522      | 62       | ND   | -0.598     | -0.618     | 109      | 2H10 | 0.090      | 0.090      |
| 16       | CMA  | -0.395     | -0.382     | 63       | C1D  | 0.416      | 0.484      | 210      | C11  | -0.180     | -0.180     |
| 17       | 1HMA | 0.127      | 0.125      | 64       | C2D  | 0.234      | 0.216      | 111      | 1H11 | 0.090      | 0.090      |
| 18       | 2HMA | 0.127      | 0.125      | 65       | C3D  | -0.412     | -0.412     | 112      | 2H11 | 0.090      | 0.090      |
| 19       | 3HMA | 0.127      | 0.125      | 66       | C4D  | -0.032     | 0.040      | 113      | C12  | -0.180     | -0.180     |
| 20       | CAA  | -0.315     | -0.315     | 67       | CMD  | -0.578     | -0.570     | 114      | 1H12 | 0.090      | 0.090      |
| 21       | 1HAA | 0.147      | 0.148      | 68       | 1HMD | 0.171      | 0.170      | 115      | 2H12 | 0.090      | 0.090      |
| 22       | 2HAA | 0.147      | 0.148      | 69       | 2HMD | 0.171      | 0.170      | 116      | C13  | -0.090     | -0.090     |
| 23       | CBA  | -0.198     | -0.190     | 70       | 3HMD | 0.171      | 0.170      | 117      | 1H13 | 0.090      | 0.090      |
| 24       | 1HBA | 0.052      | 0.050      | 71       | CAD  | 0.902      | 0.871      | 118      | C14  | -0.270     | -0.270     |
| 25       | 2HBA | 0.052      | 0.050      | 72       | OBD  | -0.601     | -0.612     | 119      | 1H14 | 0.090      | 0.090      |
| 26       | CGA  | 0.942      | 0.942      | 73       | CBD  | -0.755     | -0.747     | 220      | 2H14 | 0.090      | 0.090      |
| 27       | O1A  | -0.654     | -0.656     | 74       | HBD  | 0.207      | 0.206      | 121      | 3H14 | 0.090      | 0.090      |
| 28       | O2A  | -0.416     | -0.417     | 75       | CGD  | 0.903      | 0.905      | 122      | C15  | -0.180     | -0.180     |
| 29       | NB   | -0.699     | -0.714     | 76       | O1D  | -0.625     | -0.627     | 123      | 1H15 | 0.090      | 0.090      |
| 30       | C1B  | 0.178      | 0.208      | 77       | O2D  | -0.338     | -0.342     | 124      | 2H15 | 0.090      | 0.090      |
| 31       | C2B  | 0.368      | 0.330      | 78       | CED  | -0.313     | -0.310     | 125      | C16  | -0.180     | -0.180     |
| 32       | C3B  | -0.630     | -0.663     | 79       | 1HED | 0.170      | 0.168      | 126      | 1H16 | 0.090      | 0.090      |
| 33       | C4B  | 0.606      | 0.681      | 80       | 2HED | 0.170      | 0.168      | 127      | 2H16 | 0.090      | 0.090      |
| 34       | CMB  | -0.647     | -0.640     | 81       | 3HED | 0.170      | 0.168      | 128      | C17  | -0.180     | -0.180     |
| 35       | 1HMB | 0.182      | 0.181      | 82       | C1   | -0.170     | -0.170     | 129      | 1H17 | 0.090      | 0.090      |
| 36       | 2HMB | 0.182      | 0.181      | 83       | H11  | 0.177      | 0.17       | 230      | 2H17 | 0.090      | 0.090      |
| 37       | 3HMB | 0.182      | 0.181      | 84       | H12  | 0.177      | 0.17       | 131      | C18  | -0.090     | -0.090     |
| 38       | CAB  | 0.939      | 0.915      | 85       | C2   | -0.410     | -0.410     | 132      | 1H18 | 0.090      | 0.090      |
| 39       | OB   | -0.633     | -0.647     | 86       | H21  | 0.139      | 0.139      | 133      | C19  | -0.270     | -0.270     |
| 40       | CBB  | -0.732     | -0.736     | 87       | C3   | 0.055      | 0.055      | 134      | 1H19 | 0.090      | 0.090      |
| 41       | 1HBB | 0.190      | 0.191      | 88       | C4   | -0.244     | -0.244     | 135      | 2H19 | 0.090      | 0.090      |
| 42       | 2HBB | 0.190      | 0.191      | 89       | H41  | 0.108      | 0.108      | 136      | 3H19 | 0.090      | 0.090      |
| 43       | 3HBB | 0.190      | 0.191      | 90       | H42  | 0.108      | 0.108      | 137      | C20  | -0.270     | -0.270     |
| 44       | NC   | -0.629     | -0.675     | 91       | H43  | 0.108      | 0.108      | 138      | 1H20 | 0.090      | 0.090      |
| 45       | C1C  | 0.524      | 0.573      | 92       | C5   | 0.118      | 0.118      | 139      | 2H20 | 0.090      | 0.090      |
| 46       | C2C  | -0.218     | -0.218     | 93       | H51  | 0.009      | 0.009      | 140      | 3H20 | 0.090      | 0.090      |
| 47       | H2C  | 0.132      | 0.135      | 94       | H52  | 0.009      | 0.009      |          |      |            |            |

**Table S3:** Atomic transition charges  $q_I(1,0)$  of the transition density of the  $S_0 \rightarrow S_1$  transition of geometry-optimized planar BChl *a*. The partial charges were obtained in ref.<sup>S5</sup> from a fit of the electrostatic potential (ESP) of the transition density obtained with (time-dependent) density functional theory, using the B3LYP exchange correlation functional and a 6-31G\* basis set. Please note that the charges reported in the SI of ref.<sup>S5</sup> are unscaled. Here, we report rescaled charges that take into account the experimental value (37.1 D<sup>2</sup>)<sup>S6</sup> of the vacuum dipole strength of BChl *a* and a screening and local field correction factor of 0.8.<sup>S3</sup>

| <i>I</i> | Atom | $q_I(1,0)$ | <i>I</i> | Atom | $q_I(1,0)$ |
|----------|------|------------|----------|------|------------|
| 1        | MG   | 0.02669    | 25       | CBB  | -0.01204   |
| 2        | CHA  | -0.08946   | 26       | NC   | -0.01066   |
| 3        | CHB  | 0.00948    | 27       | C1C  | -0.05121   |
| 4        | CHC  | 0.02872    | 28       | C2C  | 0.01214    |
| 5        | CHD  | -0.02597   | 29       | C3C  | -0.01773   |
| 6        | NA   | -0.04141   | 30       | C4C  | 0.07369    |
| 7        | C1A  | 0.08522    | 31       | CMC  | -0.00492   |
| 8        | C2A  | -0.01228   | 32       | CAC  | -0.00055   |
| 9        | C3A  | -0.00172   | 33       | CBC  | 0.00610    |
| 10       | C4A  | -0.01078   | 34       | ND   | -0.08538   |
| 11       | CMA  | -0.00737   | 35       | C1D  | 0.07051    |
| 12       | CAA  | 0.01006    | 36       | C2D  | 0.01416    |
| 13       | CBA  | -0.00598   | 37       | C3D  | -0.02332   |
| 14       | CGA  | 0.00320    | 38       | C4D  | 0.12691    |
| 15       | O1A  | -0.00343   | 39       | CMD  | 0.01985    |
| 16       | O2A  | 0.00231    | 40       | CAD  | 0.02270    |
| 17       | NB   | 0.01784    | 41       | OBD  | 0.01323    |
| 18       | C1B  | -0.05542   | 42       | CBD  | 0.00148    |
| 19       | C2B  | 0.00057    | 43       | CGD  | 0.00128    |
| 20       | C3B  | -0.04265   | 44       | O1D  | 0.00562    |
| 21       | C4B  | -0.02130   | 45       | O2D  | -0.00448   |
| 22       | CMB  | -0.02070   | 46       | CED  | 0.00497    |
| 23       | CAB  | 0.01586    | 47       | C1   | -0.00034   |
| 24       | OBB  | -0.02353   |          |      |            |

Table S4: Excitonic couplings between BChl  $m$  and  $n$  within the three monomeric subunits of the FMO protein.  $V_{mn}^{\text{PD}}(\text{cr})$  is the coupling obtained in point-dipole approximation using the crystal structure, where the transition dipole moment was placed at the center of the line connecting the  $N_{\text{B}}$  and the  $N_{\text{D}}$  atoms of the pigments and the transition dipole moment was assumed to be directed along this line. The  $\langle V_{mn} \rangle$  and FWHM characterize the center and the full width at half maximum, respectively, of the Gaussian distribution functions obtained for the excitonic couplings with the FRODA-TrEsp method. In this method, the FRODA Monte Carlo sampling of protein conformations was combined with the TrEsp calculations of excitonic couplings. The numbers in brackets for monomer 1 give the corresponding values in point-dipole approximation (taken from Table 1 of ref<sup>S13</sup>). All energies are given in units of  $\text{cm}^{-1}$ .

| $m - n$ | Monomer 1                       |                          |             | Monomer 2                       |                          |      | Monomer 3                       |                          |      |
|---------|---------------------------------|--------------------------|-------------|---------------------------------|--------------------------|------|---------------------------------|--------------------------|------|
|         | $V_{mn}^{\text{PD}}(\text{cr})$ | $\langle V_{mn} \rangle$ | FWHM        | $V_{mn}^{\text{PD}}(\text{cr})$ | $\langle V_{mn} \rangle$ | FWHM | $V_{mn}^{\text{PD}}(\text{cr})$ | $\langle V_{mn} \rangle$ | FWHM |
| 1-2     | -91.2                           | -105.8 (-92.8)           | 26.3 (18.4) | -91.6                           | -99.2                    | 29.2 | -91.8                           | -97.5                    | 31.1 |
| 1-3     | 5.1                             | 6.0 (5.8)                | 1.7 (1.6)   | 5.1                             | 4.9                      | 1.8  | 5.7                             | 5.2                      | 1.8  |
| 1-4     | -5.9                            | -6.4 (-5.9)              | 1.5 (1.4)   | -6.0                            | -6.1                     | 1.4  | -6.8                            | -6.4                     | 1.5  |
| 1-5     | 6.4                             | 8.0 (7.1)                | 2.3 (2.1)   | 6.4                             | 7.9                      | 2.2  | 8.0                             | 7.7                      | 2.3  |
| 1-6     | -15.3                           | -22.1 (-14.6)            | 12.8 (10.6) | -15.4                           | -24.3                    | 13.0 | -15.1                           | -23.1                    | 13.0 |
| 1-7     | -11.5                           | -7.8 (-9.8)              | 4.9 (4.7)   | -11.5                           | -8.9                     | 5.1  | -9.9                            | -7.9                     | 4.9  |
| 1-8'    | 40.9                            | 23.3                     | 12.0        | 41.1                            | 25.2                     | 12.6 | 31.5                            | 23.8                     | 12.5 |
| 2-3     | 30.5                            | 32.8 (29.4)              | 5.5 (4.7)   | 30.6                            | 31.5                     | 6.0  | 31.5                            | 32.8                     | 6.2  |
| 2-4     | 8.0                             | 7.2 (6.4)                | 2.0 (1.9)   | 8.1                             | 7.04                     | 1.9  | 7.0                             | 7.0                      | 2.1  |
| 2-5     | 1.1                             | 1.3 (1.4)                | 2.9 (2.8)   | 1.1                             | 1.5                      | 2.7  | 1.8                             | 1.7                      | 2.9  |
| 2-6     | 13.1                            | 12.2 (10.9)              | 3.2 (2.8)   | 13.1                            | 11.2                     | 4.3  | 7.3                             | 10.5                     | 4.5  |
| 2-7     | 7.3                             | 2.9 (2.7)                | 6.0 (6.8)   | 7.3                             | 2.0                      | 5.8  | -1.5                            | 0.9                      | 6.2  |
| 2-8'    | 6.4                             | 3.7                      | 2.9         | 6.4                             | 4.1                      | 3.2  | 1.2                             | 4.0                      | 3.0  |
| 3-4     | -56.9                           | -60.3 (-47.0)            | 22.2 (30.6) | -57.1                           | -55.3                    | 26.4 | -44.5                           | -52.1                    | 26.8 |
| 3-5     | -2.8                            | 1.3 (-0.1)               | 3.4 (1.5)   | -2.8                            | 1.0                      | .8   | -3.3                            | 1.5                      | 3.7  |
| 3-6     | -9.6                            | -9.2 (-9.4)              | 1.0 (0.9)   | -9.6                            | -9.1                     | 1.0  | -9.1                            | -9.2                     | 1.1  |
| 3-7     | 0.1                             | 7.4 (15.8)               | 20.6 (23.5) | 0.1                             | -4.1                     | 18.9 | 2.5                             | -1.5                     | 18.9 |
| 3-8'    | 1.1                             | 0.4                      | 0.7         | 1.1                             | 0.4                      | 0.7  | 2.3                             | 0.3                      | 0.6  |
| 4-5     | -70.5                           | -66.7 (-58.8)            | 22.6 (17.2) | -70.8                           | -54.2                    | 19.8 | -70.0                           | -55.9                    | 20.3 |
| 4-6     | -16.8                           | -17.7 (-16.1)            | 4.2 (3.5)   | -16.9                           | -17.2                    | 3.7  | -15.4                           | -17.1                    | 3.9  |
| 4-7     | -62.1                           | -65.8 (-63.1)            | 24.0 (17.4) | -62.4                           | -63.1                    | 22.6 | -67.1                           | -67.8                    | 22.2 |
| 4-8'    | -1.7                            | -1.6                     | 0.7         | -1.7                            | -1.6                     | 0.6  | -1.3                            | -1.6                     | 0.6  |
| 5-6     | 80.1                            | 79.9 (91.3)              | 33.4 (33.0) | 80.5                            | 85.1                     | 28.9 | 87.8                            | 87.0                     | 28.3 |
| 5-7     | -2.2                            | 5.5 (-2.6)               | 12.9 (12.7) | -2.2                            | 2.4                      | 12.1 | -5.8                            | 2.7                      | 12.3 |
| 5-8'    | 4.2                             | 3.8                      | 0.8         | 4.2                             | 4.1                      | 0.8  | 5.8                             | 4.1                      | 0.7  |
| 6-7     | 39.4                            | 35.5 (35.0)              | 13.2 (13.4) | 39.6                            | 34.3                     | 14.0 | 41.1                            | 34.3                     | 14.1 |
| 6-8'    | -8.9                            | -9.0                     | 4.0         | -9.0                            | -9.9                     | 3.7  | -7.0                            | -10.5                    | 3.6  |
| 7-8'    | -10.8                           | -7.9                     | 2.2         | -10.9                           | -11.3                    | 1.9  | -8.1                            | -11.3                    | 1.8  |

## References

- (S1) Renger, T.; Klinger, A.; Steinecker, F.; Schmidt am Busch, M.; Numata, J.; Müh, F. Normal Mode Analysis of the Spectral Density of the Fenna-Matthews-Olson Light-Harvesting Protein: How the Protein Dissipates the Excess Energy of Excitons. *J. Phys. Chem. B* **2012**, *116*, 14565–14580.
- (S2) Renger, T.; Marcus, R. A. On the relation of protein dynamics and exciton relaxation in pigment-protein complexes: an estimation of the spectral density and a theory for the calculation of optical spectra. *J. Chem. Phys.* **2002**, *116*, 9997–10019.
- (S3) Adolphs, J.; Renger, T. How proteins trigger excitation energy transfer in the FMO complex of green sulfur bacteria. *Biophys. J.* **2006**, *91*, 2778–2797.
- (S4) Renger, T.; May, V. Simulations of frequency-domain spectra: Structure-function relationships in photosynthetic pigment-protein complexes. *Phys. Rev. Lett.* **2000**, *84*, 5228–5231.
- (S5) Madjet, M. E.; Abdurahman, A.; Renger, T. Intermolecular Coulomb couplings from ab initio electrostatic potentials: application to optical transitions of strongly coupled pigments in photosynthetic antennae and reaction centers. *J. Phys. Chem. B* **2006**, *110*, 17268–17281.
- (S6) Knox, R. S.; Spring, B. Q. Dipole strengths in the chlorophylls. *Photochem. Photobiol.* **2003**, *77*, 497–501.
- (S7) Tronrud, D. E.; Wen, J.; Gay, L.; Blankenship, R. E. The structural basis for the difference in absorbance spectra for the FMO antenna protein from various green sulfur bacteria. *Photosynth. Res.* **2009**, *100*, 79–87.
- (S8) Schmidt am Busch, M.; Müh, F.; Madjet, M. E.; Renger, T. The Eighth Bacteri-

- ochlorophyll Completes the Excitation Energy Funnel in the FMO Protein. *J. Phys. Chem. Lett.* **2011**, *2*, 93–98.
- (S9) Saito, S.; Higashi, M.; Fleming, G. R. Site-Dependent Fluctuations Optimize Electronic Energy Transfer in the Fenna-Matthews-Olson Protein. *J. Phys. Chem. B* **2019**, *123*, 9762–9772.
- (S10) Jurinovich, S.; Curutchet, C.; Mennucci, B. The Fenna-Matthews-Olson Protein Revisited: A Fully Polarizable (TD)DFT/MM Description. *Chem. Phys. Chem.* **2014**, *15*, 3194–3204.
- (S11) Kim, Y.; Morozov, D.; Stadnytski, S., V. Savikhin; Slipchenko, L. V. Predictive First-Principles Modeling of a Photosynthetic Antenna Protein: The Fenna-Matthews-Olson Complex. *J. Phys. Chem. Lett.* **2020**, *11*, 1636–1643.
- (S12) Wendling, M.; Przyjalowski, M. A.; Gülen, D.; Vulto, S. I. E.; Aartsma, T. J.; van Grondelle, R.; van Amerongen, H. The quantitative relationship between structure and polarized spectroscopy in the FMO complex of *Prosthecochloris aestuarii*: refining experiments and simulations. *Photosynth. Res.* **2002**, *71*, 99–123.
- (S13) Fokas, A. S.; Cole, D. J.; Chin, A. W. Constrained geometric dynamics of the Fenna-Matthews-Olson complex: the role of correlated motion in reducing uncertainty in excitation energy transfer. *Photosynth. Res.* **2014**, *122*, 275–292.
